# Supplementary material
Source: PubMed Central journal article supplement (PMC5647507)
Supplement: Supp_Fig1.pdf [file Supp_Fig1.pdf]

## Supplementary Data

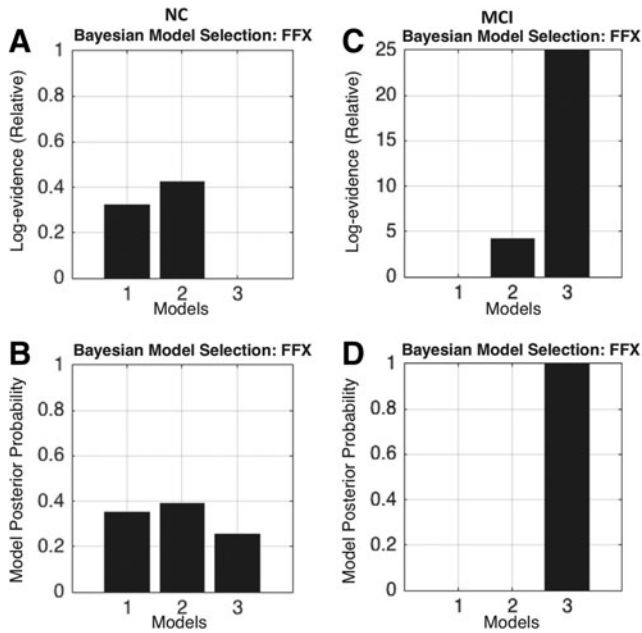

**SUPPLEMENTARY FIG. S1.** The first column (**A, B**) displays the FFX results in terms of log-evidence and posterior probability in NC group indicating that model 2 has a higher probability than other models. The second column (**C, D**) displays the FFX results in MCI group demonstrating that model 2 no longer has a higher probability, instead it shifted to model 3. FFX, fixed effects; MCI, mild cognitive impairment; NC, normal control.
