# Supplementary material
Source: PubMed Central journal article supplement (PMC5647507)
Supplement: Supp_Fig2.pdf [file Supp_Fig2.pdf]

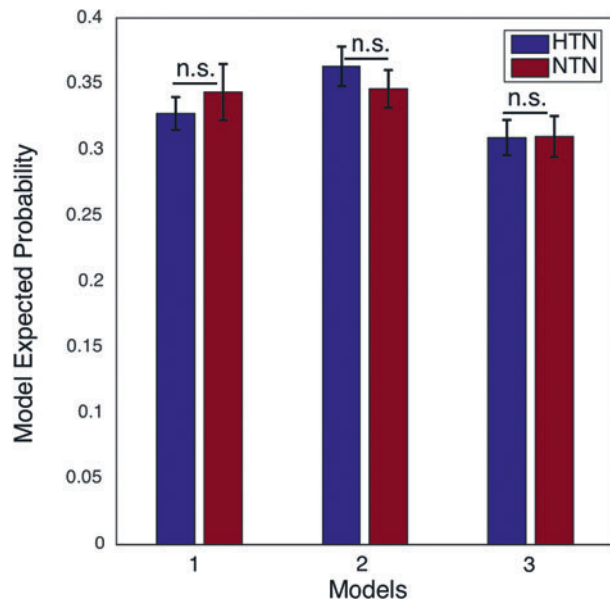

**SUPPLEMENTARY FIG. S2.** Comparison of model expected probability value using random effects analysis between HTN and NTN cognitively normal individuals within each model demonstrating n.s. statistical difference (*t*-test;  $p > 0.3$ ). HTN, hypertensive; n.s., not significant; NTN, normotensive.
